# Supplementary material
Source: Royal Society of Chemistry journal article supplement (doi:10.1039/d6ta02036d)
Supplement: d6ta02036d1.pdf [file d6ta02036d1.pdf]

Supporting Information

**Engineering  $\text{Ti}_3\text{C}_2$  electronic structure via surface termination synergy for high-efficiency electromagnetic wave absorption**

Yan Wang,<sup>a</sup> Han Zhang,<sup>a</sup> Zhenrong Cui,<sup>a</sup> Zhi Geng,<sup>a</sup> Shujie Pang, Jianglan Shui <sup>\*a</sup> and Xiaofang Liu<sup>\*a</sup>

*State Key Laboratory of Tropic Ocean Engineering Materials and Materials Evaluation,  
School of Materials Science and Engineering, Beihang University, Beijing 100191, PR  
China*

*\*Corresponding authors: Xiaofang Liu (Email: liuxf05@buaa.edu.cn) Jianglan Shui  
(Email: shuijianglan@buaa.edu.cn)*

Supplementary Information contains:

1. Supplementary Fig. S1–S12
2. Supplementary Table S1
3. Supplementary References

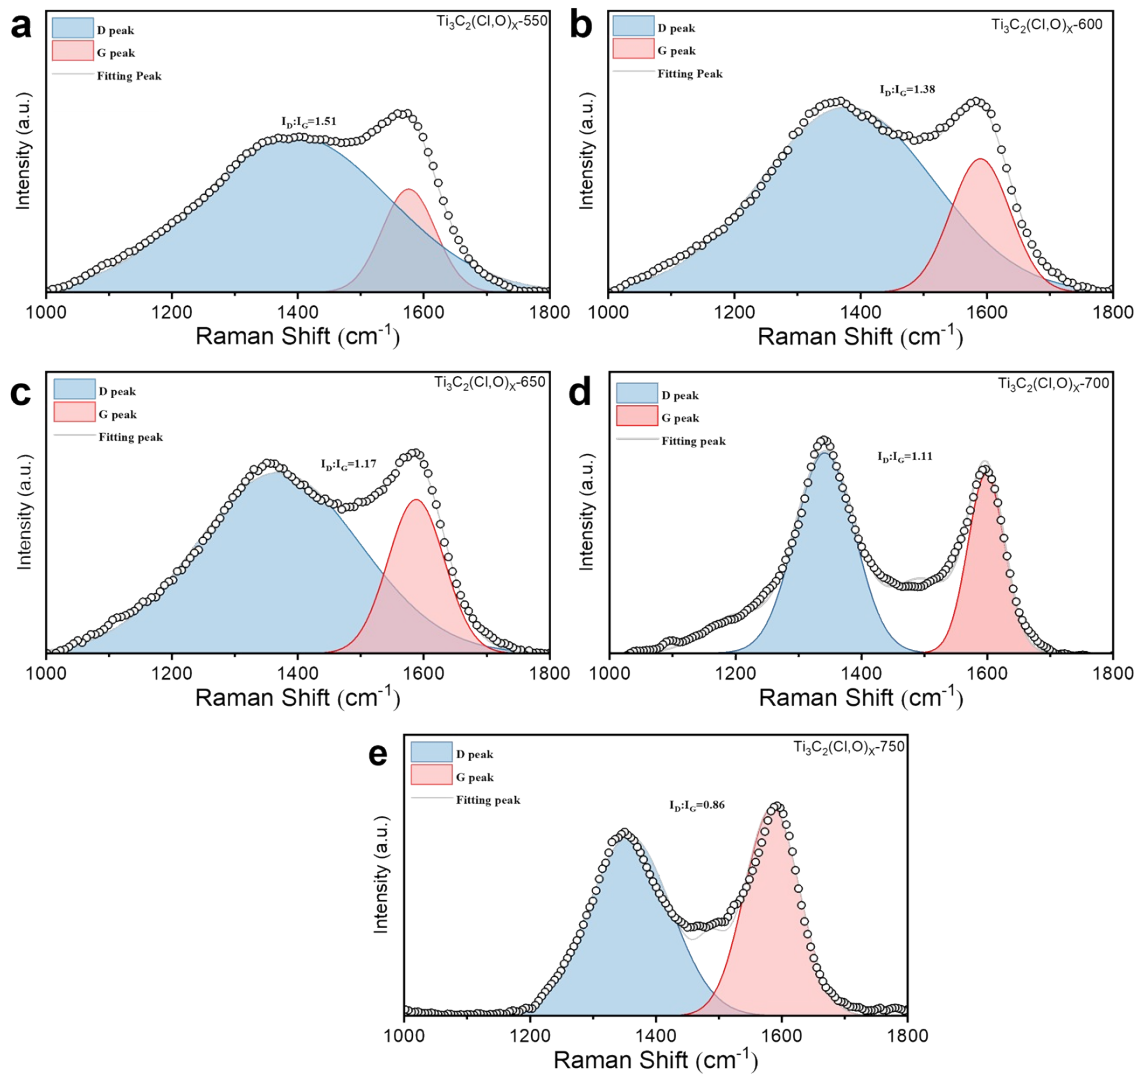

**Fig. S1** Raman spectras of (a) Ti<sub>3</sub>C<sub>2</sub>(Cl,O)<sub>x-550</sub>, (b) Ti<sub>3</sub>C<sub>2</sub>(Cl,O)<sub>x-600</sub>, (c) Ti<sub>3</sub>C<sub>2</sub>(Cl,O)<sub>x-650</sub>, (d) Ti<sub>3</sub>C<sub>2</sub>(Cl,O)<sub>x-700</sub>, (e) Ti<sub>3</sub>C<sub>2</sub>(Cl,O)<sub>x-750</sub>.

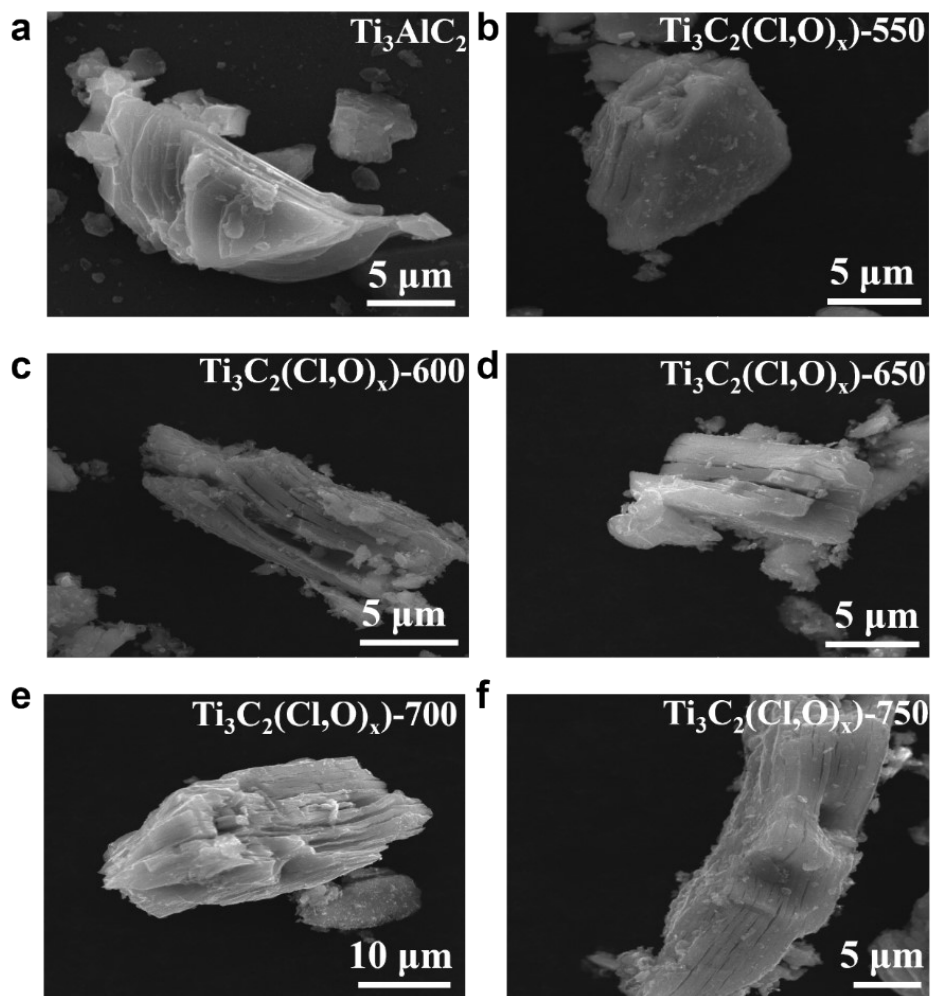

**Fig. S2** SEM images of (a)  $\text{Ti}_3\text{AlC}_2$ , (b)  $\text{Ti}_3\text{C}_2(\text{Cl},\text{O})_x-550$ , (c)  $\text{Ti}_3\text{C}_2(\text{Cl},\text{O})_x-600$ , (d)  $\text{Ti}_3\text{C}_2(\text{Cl},\text{O})_x-650$ , (e)  $\text{Ti}_3\text{C}_2(\text{Cl},\text{O})_x-700$ , (f)  $\text{Ti}_3\text{C}_2(\text{Cl},\text{O})_x-750$ .

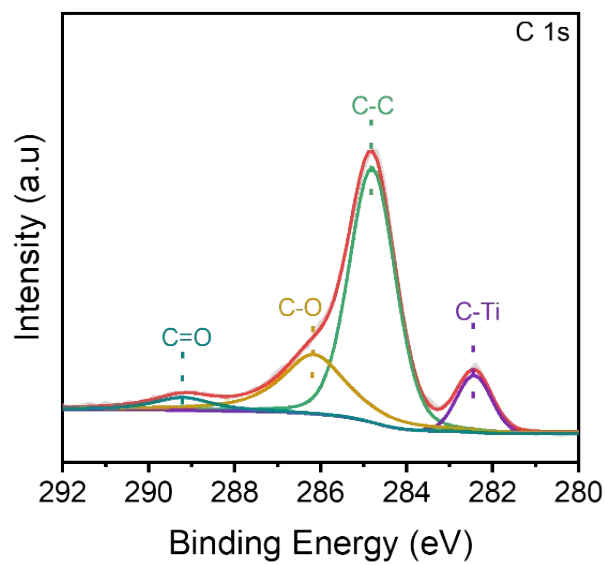

**Fig. S3** C 1s spectrum of  $\text{Ti}_3\text{C}_2(\text{Cl},\text{O})_x-650$ .

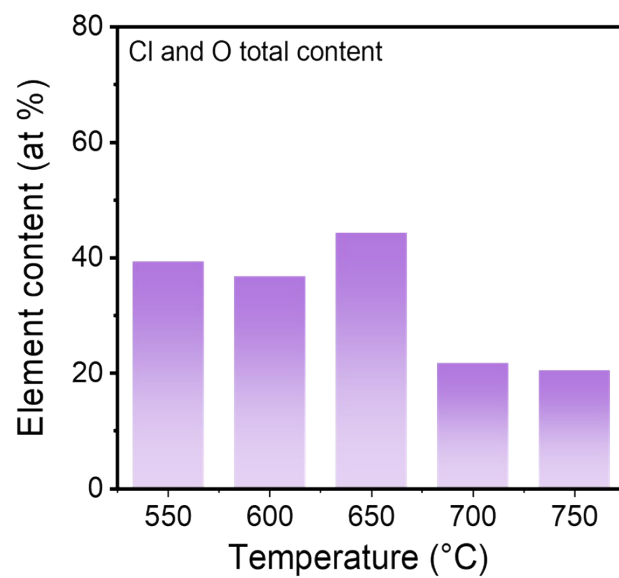

**Fig. S4** The total number of Cl and O atoms in  $\text{Ti}_3\text{C}_2(\text{Cl},\text{O})_x-T$  samples.

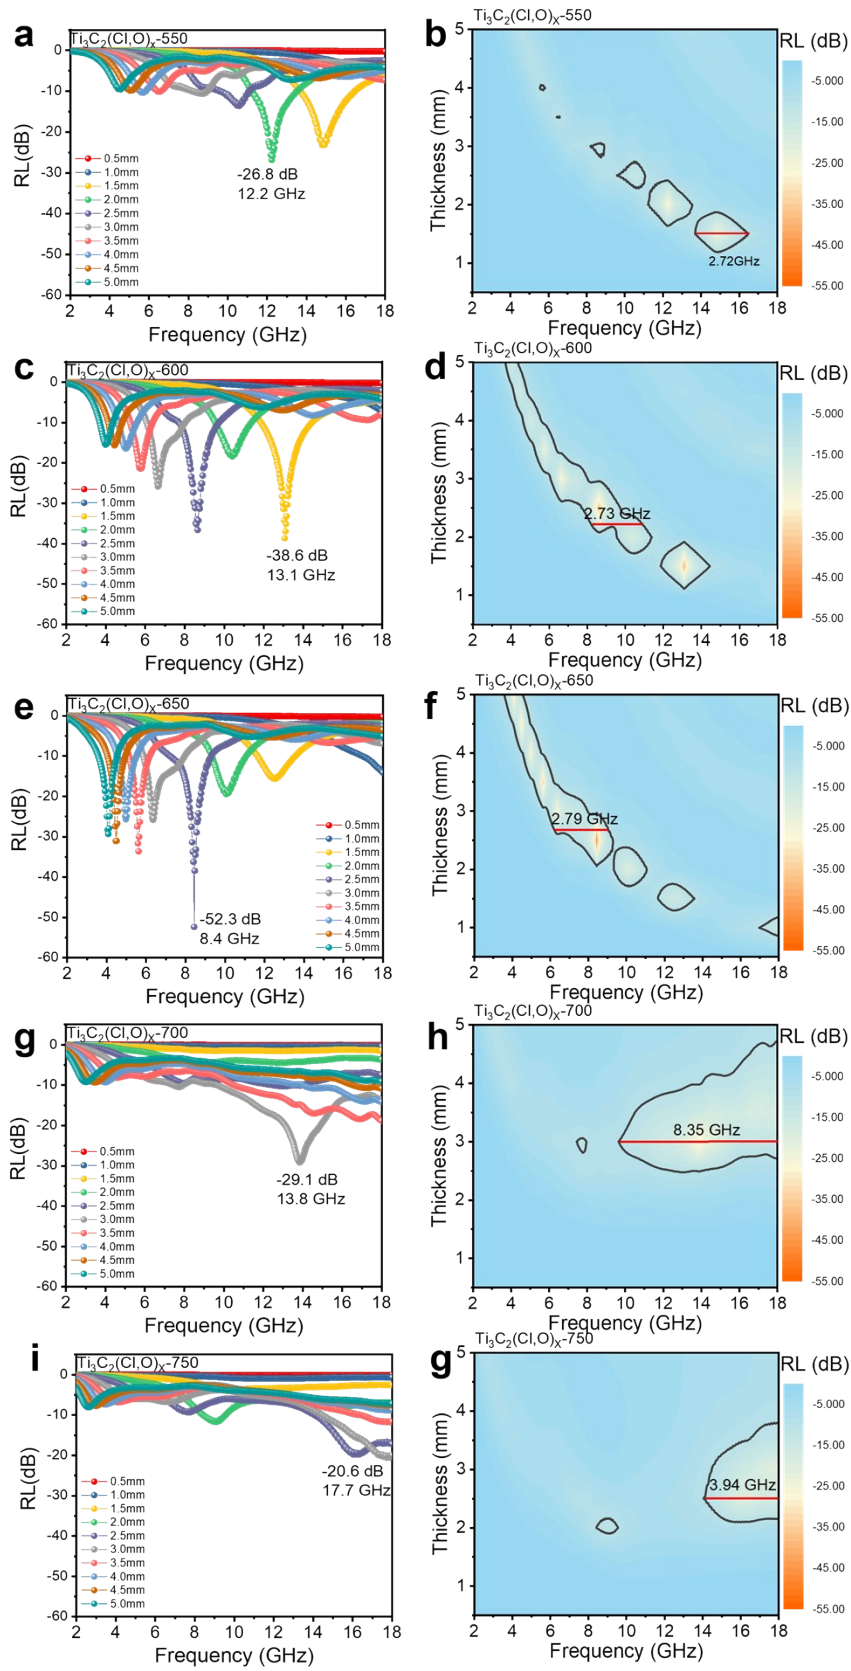

**Fig. S5** RL curves and 2D contour plots of RL for (a,b)  $\text{Ti}_3\text{C}_2(\text{Cl},\text{O})_{x-550}$ , (c,d)  $\text{Ti}_3\text{C}_2(\text{Cl},\text{O})_{x-600}$ , (e,f)  $\text{Ti}_3\text{C}_2(\text{Cl},\text{O})_{x-650}$ , (g,h)  $\text{Ti}_3\text{C}_2(\text{Cl},\text{O})_{x-700}$ , (i,g)  $\text{Ti}_3\text{C}_2(\text{Cl},\text{O})_{x-750}$ .

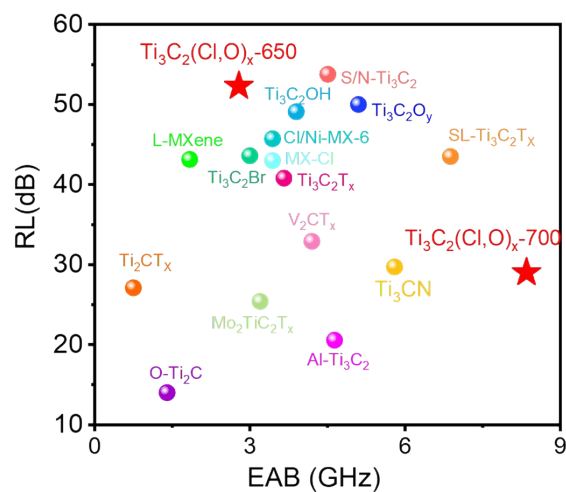

**Fig. S6** Comparison of EMW absorption performances.

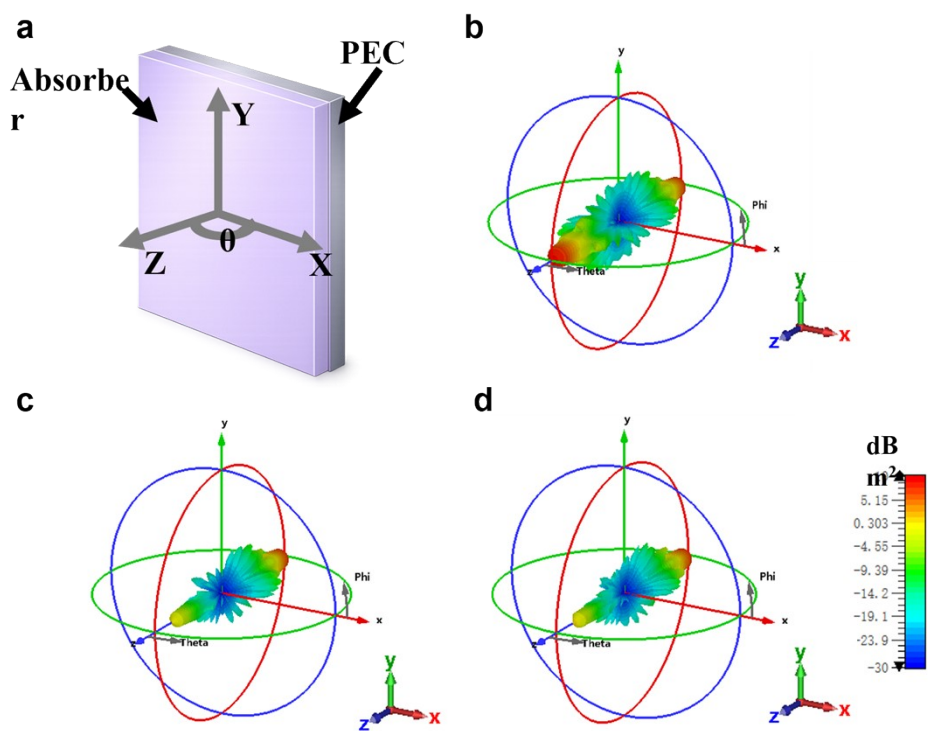

**Fig. S7** (a) RCS simulation model, 3D RCS of (b) PEC, (c) PEC coated with  $\text{Ti}_3\text{C}_2(\text{Cl},\text{O})_x-650$  at 2.5 mm, (d) PEC coated with  $\text{Ti}_3\text{C}_2(\text{Cl},\text{O})_x-700$  at 3.0 mm.

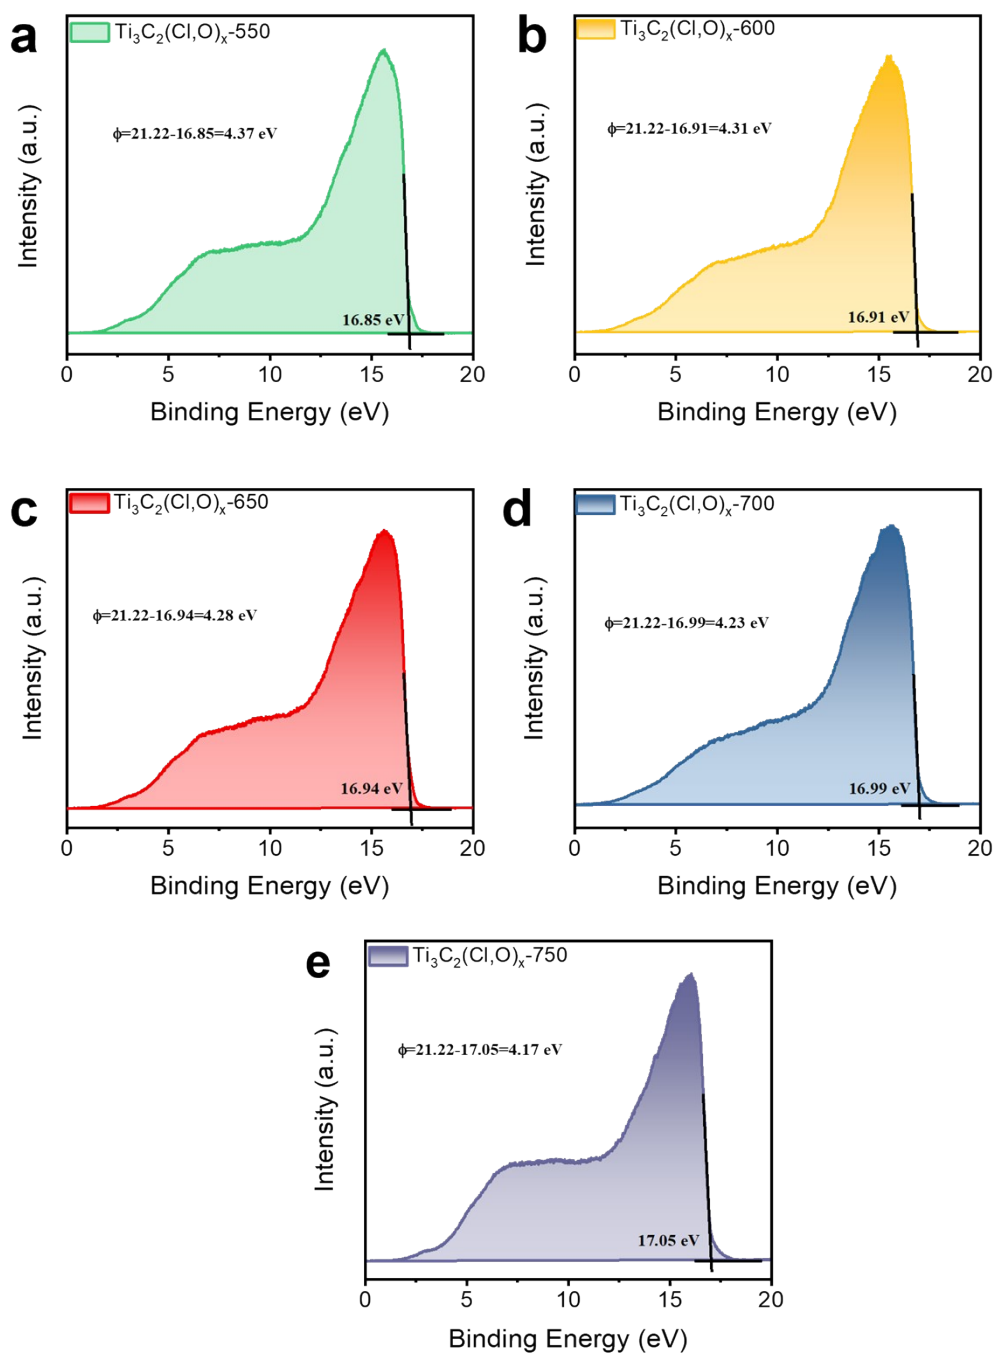

**Fig. S8** Work functions of (a)  $\text{Ti}_3\text{C}_2(\text{Cl},\text{O})_{x-550}$ , (b)  $\text{Ti}_3\text{C}_2(\text{Cl},\text{O})_{x-600}$ , (c)  $\text{Ti}_3\text{C}_2(\text{Cl},\text{O})_{x-650}$ , (d)  $\text{Ti}_3\text{C}_2(\text{Cl},\text{O})_{x-700}$ , (e)  $\text{Ti}_3\text{C}_2(\text{Cl},\text{O})_{x-750}$ .

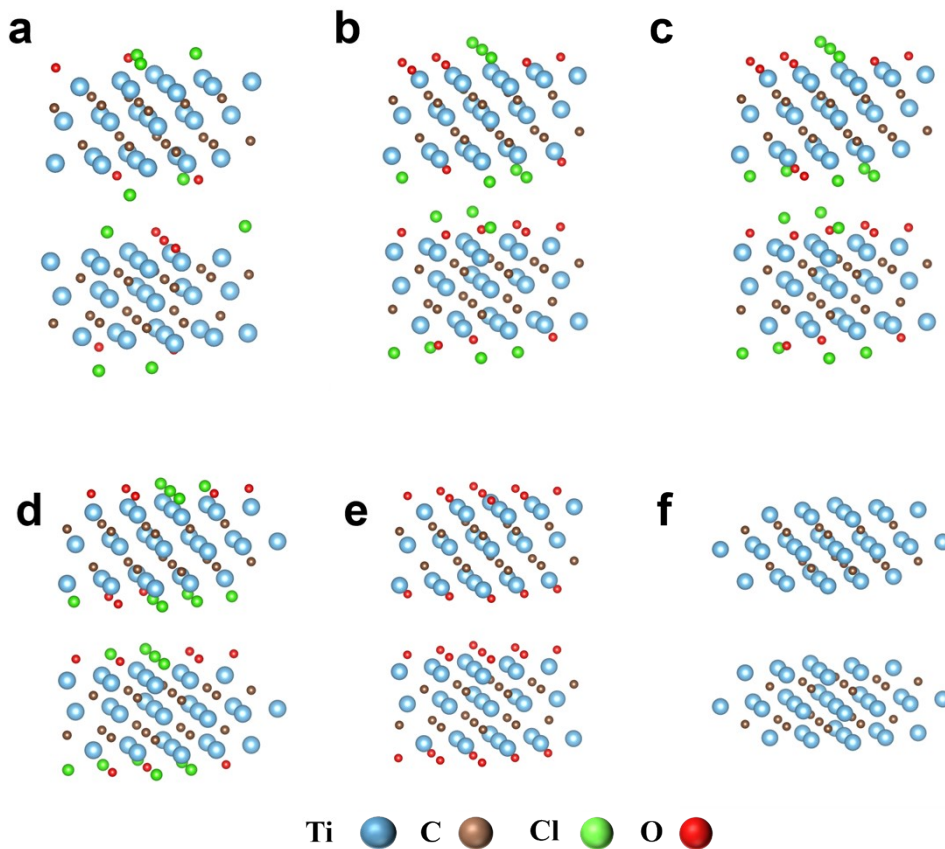

**Fig. S9** Theoretical computational models. (a)  $\text{Ti}_3\text{C}_2(\text{Cl},\text{O})_x$  with a surface Cl/O atomic ratio of 0.5, (b)  $\text{Ti}_3\text{C}_2(\text{Cl},\text{O})_x$  with a surface Cl/O atomic ratio of 0.6, (c)  $\text{Ti}_3\text{C}_2(\text{Cl},\text{O})_x$  with a surface Cl/O atomic ratio of 0.7, (d)  $\text{Ti}_3\text{C}_2(\text{Cl},\text{O})_x$  with a surface Cl/O atomic ratio of 1.3, (e)  $\text{Ti}_3\text{C}_2$  with O functional groups, (f)  $\text{Ti}_3\text{C}_2$  without functional group.

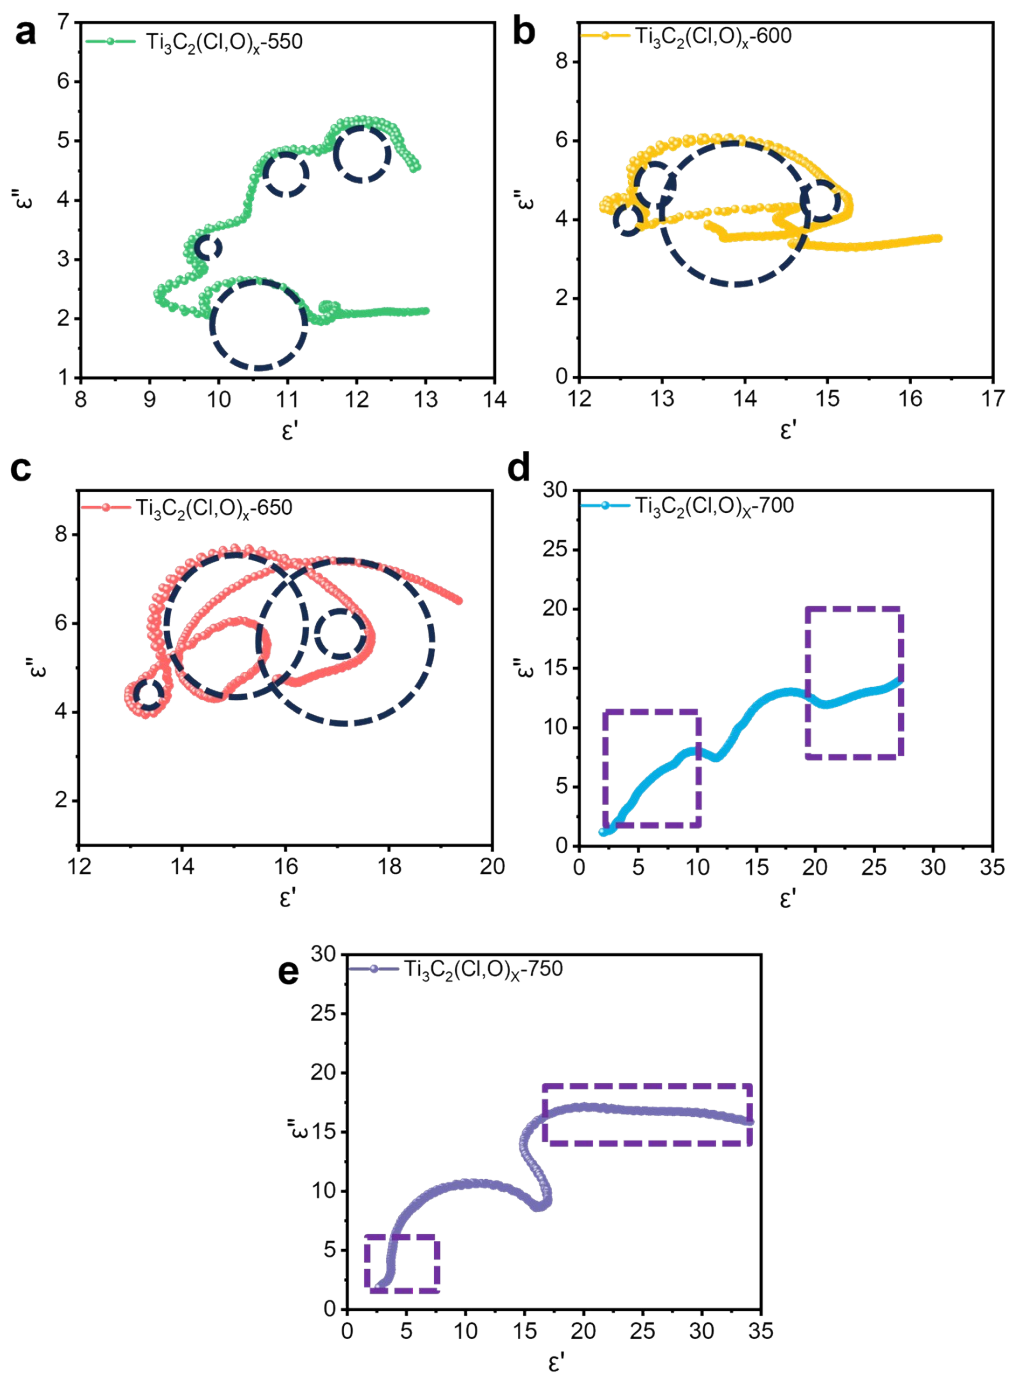

**Fig. S10** Cole-Cole curves of (a)  $\text{Ti}_3\text{C}_2(\text{Cl},\text{O})_x-550$ , (b)  $\text{Ti}_3\text{C}_2(\text{Cl},\text{O})_x-600$ , (c)  $\text{Ti}_3\text{C}_2(\text{Cl},\text{O})_x-650$ , (d)  $\text{Ti}_3\text{C}_2(\text{Cl},\text{O})_x-700$ , (e)  $\text{Ti}_3\text{C}_2(\text{Cl},\text{O})_x-750$ .

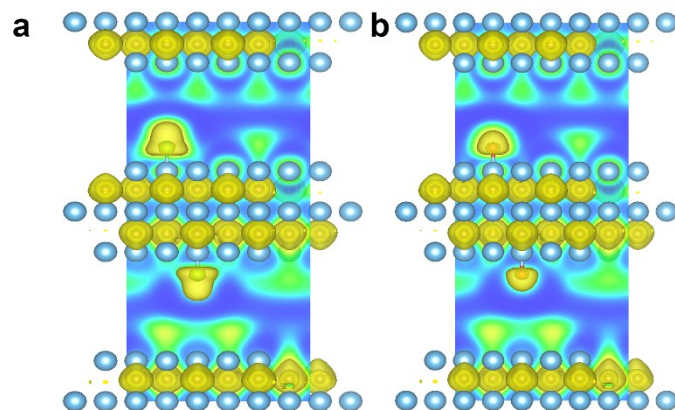

**Fig. S11** 2D ELF plots of Ti-Cl and Ti-O chemical bonds in the  $\text{Ti}_3\text{C}_2(\text{Cl},\text{O})_x$  model.

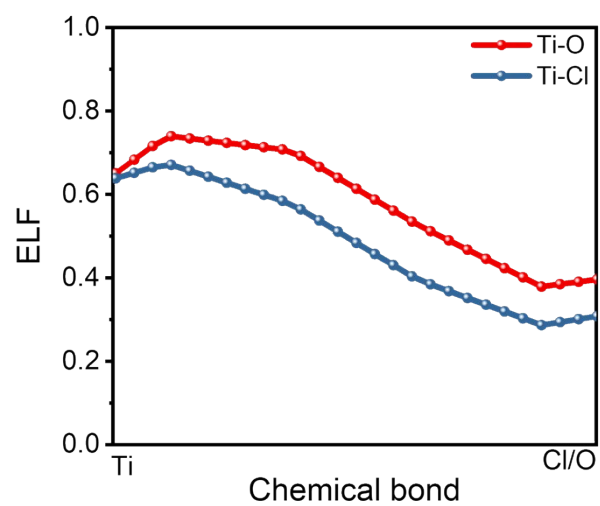

**Fig. S12** Line profiles of Ti-Cl and Ti-O bonds of ELF value in  $\text{Ti}_3\text{C}_2(\text{Cl},\text{O})_x$ .

**Table S1** Performance comparison of different MXenes

| <i>Samples</i>                                           | <i>RL<sub>min</sub> (dB)</i> | <i>EAB<sub>max</sub> (GHz)</i> | <i>Reference</i> |
|----------------------------------------------------------|------------------------------|--------------------------------|------------------|
| <i>Ti<sub>3</sub>C<sub>2</sub>T<sub>x</sub></i>          | -40.80                       | 3.66                           | 1                |
| <i>Ti<sub>2</sub>CT<sub>x</sub></i>                      | -27.10                       | 0.75                           | 2                |
| <i>MX-Cl</i>                                             | -42.99                       | 3.44                           | 3                |
| <i>Cl/Ni-MX-6</i>                                        | -45.72                       | 3.44                           | 4                |
| <i>Ti<sub>3</sub>C<sub>2</sub>O<sub>y</sub></i>          | -50.50                       | 5.10                           | 5                |
| <i>V<sub>2</sub>CT<sub>x</sub></i>                       | -32.90                       | 4.20                           | 6                |
| <i>L-MXene</i>                                           | -43.14                       | 1.84                           | 7                |
| <i>SL-Ti<sub>3</sub>C<sub>2</sub>T<sub>x</sub></i>       | -43.50                       | 6.88                           | 8                |
| <i>Al-Ti<sub>3</sub>C<sub>2</sub></i>                    | -20.56                       | 4.64                           | 9                |
| <i>Ti<sub>3</sub>CN</i>                                  | -29.70                       | 5.80                           | 9                |
| <i>Ti<sub>3</sub>C<sub>2</sub>Br</i>                     | -43.60                       | 3.00                           | 9                |
| <i>Ti<sub>3</sub>C<sub>2</sub>OH</i>                     | -49.10                       | 3.90                           | 10               |
| <i>Mo<sub>2</sub>TiC<sub>2</sub>T<sub>x</sub></i>        | -25.39                       | 3.20                           | 11               |
| <i>O-Ti<sub>2</sub>C</i>                                 | -14.00                       | 1.44                           | 12               |
| <i>S/N-Ti<sub>3</sub>C<sub>2</sub></i>                   | -53.77                       | 4.51                           | 13               |
| <i>Ti<sub>3</sub>C<sub>2</sub>(Cl,O)<sub>x</sub>-650</i> | -52.30                       | 2.79                           | This work        |
| <i>Ti<sub>3</sub>C<sub>2</sub>(Cl,O)<sub>x</sub>-700</i> | -29.00                       | 8.35                           | This work        |

## Supplementary references

1. G. Cui, X. Zheng, X. Lv, Q. Jia, W. Xie and G. Gu, *Ceramics International*, 2019, **45**, 23600-23610.
2. H. Xu, X. Yin, X. Li, M. Li, L. Zhang and L. Cheng, *Functional Composites and Structures*, 2019, **1**.
3. Y. He, D. Liu, Q. Su, B. Zhong, L. Xia and X. Huang, *Journal of Materials Science Technology*, 2024, **179**, 187-197.
4. Y. He, Q. Su, D. Liu, L. Xia, X. Huang, D. Lan, Y. Liu, Y. Huang and B. Zhong, *Chemical Engineering Journal*, 2024, **491**.
5. Y. Ye, Y. Tao, J. Zhang, H. Chen, Z. Wang, Y. Shi, Q. Zhao, Y. Guo, D. Zhang, B. Li, Z. Du and S. Yang, *Nano Letters*, 2025, **25**, 7186-7193.
6. M. Han, C. E. Shuck, A. Singh, Y. Yang, A. C. Foucher, A. Goad, B. McBride, S. J. May, V. B. Shenoy, E. A. Stach and Y. Gogotsi, *Cell Reports Physical Science*, 2022, **3**, 101073.
7. X. Zeng, C. Zhao, X. Jiang, R. Yu and R. Che, *Small*, 2023, **19**, 2303393.
8. X. Zhou, J. Wen, Z. Wang, X. Ma and H. Wu, *Journal of Materials Science Technology*, 2022, **115**, 148-155.
9. X. Li, C. Chen, Y. Wu, F. Pan and W. Lu, *Chemical Engineering Journal*, 2024, **496**, 154159.
10. Y. Du, Z. Yan, W. You, Q. Men, G. Chen, X. Lv, Y. Wu, K. Luo, B. Zhao, J. Zhang and R. Che, *Advanced Functional Materials*, 2023, **33**, 2301449.
11. F. Hu, X. Wang, H. Niu, S. Zhang, B. Fan and R. Zhang, *Journal of Materials Science*, 2022, **57**, 7849-7862.
12. Y. Lei, J. Tao, J. Zhou, Z. Yao, P. Liu, X. Wei and Y. Wang, *Journal of Materials Science & Technology*, 2025, **256**, 310-320.
13. Z. Cui, X. Li, H. Zhang, G. Han, M. Fang, Y. Wang, X. Fang, L. Yan, Q. Yan, R. Yu, J. Shui and X. Liu, *Journal of Advanced Ceramics*, 2025, 9221209.
